# Supplementary material for: Precision Mapping of COVID-19 Vulnerable Locales by Epidemiological and Socioeconomic Risk Factors, Developed Using South Korean Data
Source: Int J Environ Res Public Health. 2021 Jan 12;18(2):604. doi: 10.3390/ijerph18020604 (PMC7828122; doi:10.3390/ijerph18020604)
Supplement: Supplementary file 1 [file ijerph-18-00604-s001.pdf]

## Supplementary Materials

**Table S1.** Confirmed COVID-19 cases diagnosed during January 20 - July 1, 2020 in South Korea

| Province       | Early phase | Middle phase | Late Phase |
|----------------|-------------|--------------|------------|
| Busan          | 99          | 18           | 24         |
| Chungcheongbuk | 34          | 11           | 12         |
| Chungcheongnam | 85          | 17           | 28         |
| Daegu          | 6358        | 529          | 35         |
| Daeguon        | 21          | 17           | 80         |
| Gangwon        | 30          | 20           | 13         |
| Gwangju        | 48          | 2            | 3          |
| Gyeonggi       | 324         | 325          | 567        |
| Gyeongsangbuk  | 1098        | 111          | 45         |
| Gyeongsangnam  | 86          | 26           | 17         |
| Incheon        | 38          | 47           | 253        |
| Jeju           | 3           | 9            | 6          |
| Jeollabuk      | 8           | 9            | 4          |
| Jeollanam      | 4           | 10           | 0          |
| Sejong         | 34          | 10           | 7          |
| Seoul          | 298         | 278          | 656        |
| Ulsan          | 32          | 8            | 15         |

COVID-19 cases are sorted by South Korea's provinces (comprised of 250 districts) and the pandemic phase. Early phase: January 20 to March 20, 2020; Middle phase: March 21 to April 15, 2020; Late phase: April 16 to July 1, 2020.

**Table S2.** Data sources reviewed and used for SES measurement

| Data sources                                                                          | Data items                                                                     |
|---------------------------------------------------------------------------------------|--------------------------------------------------------------------------------|
| Korean Community Health Survey 2018, Korea Centres for Disease Control and Prevention | (%) people with obesity, by measurement                                        |
|                                                                                       | (%) people drunk alcohol <1 per month                                          |
|                                                                                       | (%) people who currently smoke                                                 |
|                                                                                       | (%) people obese, self-reported                                                |
|                                                                                       | (%) of people who used health care last year                                   |
|                                                                                       | (%) people who could not use healthcare when needed last year                  |
|                                                                                       | (%) people with depression based of PHQ-9 <sup>a</sup> screening               |
| Health Insurance Statistics 2018, National Health Insurance Corporation               | (%) of the person who is all aligned for the early symptoms of stroke          |
|                                                                                       | (%) of the person on insulin and other treatment specific to diabetes mellitus |
| Disability Status 2018, Ministry of Health and Welfare                                | (%) people with severe disability                                              |
| Death Cause Statistics 2018, National Statistics Agency                               | Age adjusted mortality rate due to neoplasm                                    |
|                                                                                       | Age adjusted mortality rate due to circulatory system disease                  |
|                                                                                       | Age-adjusted mortality rate from infectious parasitic diseases                 |
|                                                                                       | Overall, age-adjusted mortality rate                                           |
|                                                                                       | Age adjusted mortality rate due to respiratory diseases                        |
| Korean Census Bureau 2015                                                             | (%) people with high school education                                          |
|                                                                                       | (%) of foreign registered people                                               |
|                                                                                       | Number of people per household                                                 |
| Office of Statistics 2015, Regional Statistics                                        | GDP per capita in million won                                                  |
| Internal Migration Statistics 2018, Statistics Korea                                  | Internal net migration between regions                                         |
| State of Urban Planning 2018, Ministry of Land, Infrastructure, Transport and Tourism | Area per capita                                                                |
|                                                                                       | Urban area per capita                                                          |

<sup>a</sup>PHQ-9: Patient Health Questionnaire -9, standard survey tool.

**Table S3.** PCA details showing factor scores with their weights, and selected area health and SES variables and thematic composite indices

| Health/SE themes                | Selected variables from national surveys | PCA Factor | Weights | Quartiles of composite indices |        |           |       |
|---------------------------------|------------------------------------------|------------|---------|--------------------------------|--------|-----------|-------|
|                                 |                                          |            |         | 25th pctl                      | Median | 75th pctl | Max   |
| Healthcare access               | Healthcare utility rate                  | 0.892      | 0.448   | 18.0                           | 21.0   | 29.6      | 44.2  |
|                                 | Insurance coverage rate                  | 0.869      | 0.437   |                                |        |           |       |
|                                 | Healthcare needs met when needed         | 0.226      | 0.115   |                                |        |           |       |
| Health behaviour                | % people with obesity, by measurement    | 0.955      | 0.438   | 41.6                           | 44.0   | 45.7      | 49.9  |
|                                 | % people drunk alcohol, < 1/month        | 0.936      | 0.429   |                                |        |           |       |
|                                 | % people who currently smoke             | 0.220      | 0.100   |                                |        |           |       |
|                                 | % people obese, self-reported            | 0.069      | 0.033   |                                |        |           |       |
| Crowding                        | <sup>a</sup> Area per capita             | 0.900      | 0.402   | 11.6                           | 12.9   | 14.6      | 22.6  |
|                                 | <sup>a</sup> Urban area per district     | 0.734      | 0.329   |                                |        |           |       |
|                                 | N of households per capita               | 0.602      | 0.269   |                                |        |           |       |
| Area morbidity                  | Overall, AAMR                            | 0.919      | 0.190   | 88.1                           | 96.7   | 102.7     | 116.9 |
|                                 | Respiratory, AAMR                        | 0.838      | 0.173   |                                |        |           |       |
|                                 | Circulatory, AAMR                        | 0.743      | 0.153   |                                |        |           |       |
|                                 | Infectious and parasitic diseases, AAMR  | 0.702      | 0.145   |                                |        |           |       |
|                                 | % people with severe disability          | 0.689      | 0.142   |                                |        |           |       |
|                                 | % people on diabetes treatment           | 0.483      | 0.099   |                                |        |           |       |
|                                 | % people with stroke symptoms            | 0.436      | 0.090   |                                |        |           |       |
|                                 | % people with mental health diseases     | 0.020      | 0.008   |                                |        |           |       |
| Difficulty to social distancing | % people living in apartment buildings   | 0.794      | 0.286   | 9.2                            | 13.3   | 15.4      | 27.6  |
|                                 | % workers in retail services             | 0.749      | 0.269   |                                |        |           |       |
|                                 | N of students per class, high school     | 0.677      | 0.244   |                                |        |           |       |
|                                 | % workers in health and social services  | 0.558      | 0.201   |                                |        |           |       |
| Population mobility             | Net migration between districts          | 0.732      | 0.500   | 0.7                            | 1.1    | 1.9       | 7.2   |
|                                 | % foreign residents in the area          | 0.732      | 0.500   |                                |        |           |       |

The factor scores and weights of each contributing variable associated with the first PCA-identified component and the quartiles of the health/SE themes are shown. Education is not included since it is already a single variable. Abbreviations: Principal component analysis (PCA); Socioeconomic (SE); age-adjusted mortality rate (AAMR). Superscripts: <sup>a</sup> km<sup>2</sup>.

**Table S4.** GNBR model estimates with and without the estimated data for Daegu's subparts throughout study period (January 20 through July 1, 2020)

| Health/SE themes                | Included estimated data |      |                    |         | Excluded estimated data |      |                    |         |
|---------------------------------|-------------------------|------|--------------------|---------|-------------------------|------|--------------------|---------|
|                                 | Estimate <sup>a</sup>   | SE   | RR (LCL - UCL)     | P-value | Estimate                | SE   | RR (LCL - UCL)     | P-value |
| Area-morbidity                  | 0.05                    | 0.01 | 1.05 (1.03 - 1.06) | <.0001  | 0.04                    | 0.01 | 1.04 (1.03 - 1.06) | <.0001  |
| Education                       | -0.11                   | 0.04 | 0.90 (0.83 - 0.97) | 0.005   | -0.12                   | 0.04 | 0.89 (0.82 - 0.96) | 0.003   |
| Crowding                        | 0.22                    | 0.12 | 1.25 (0.99 - 1.57) | 0.06    | 0.27                    | 0.13 | 1.30 (1.01 - 1.69) | 0.04    |
| Difficulty to social distancing | 0.07                    | 0.03 | 1.07 (1.01 - 1.14) | 0.02    | 0.08                    | 0.03 | 1.08 (1.02 - 1.15) | 0.01    |
| Population mobility             | -0.38                   | 0.09 | 0.69 (0.57 - 0.82) | <.0001  | -0.34                   | 0.09 | 0.71 (0.59 - 0.85) | 0.0002  |
| Healthcare access               | -0.14                   | 0.03 | 0.87 (0.82 - 0.93) | <.0001  | -0.13                   | 0.03 | 0.88 (0.82 - 0.93) | <.0001  |
| Health behaviour                | 0.04                    | 0.02 | 1.04 (1.00 - 1.08) | 0.03    | 0.04                    | 0.02 | 1.04 (1.00 - 1.08) | 0.05    |
| Dispersion                      | 3.68                    |      |                    |         | 3.69                    |      |                    |         |
| AIC                             | 1527                    |      |                    |         | 1425                    |      |                    |         |

Superscripts: <sup>a</sup> Parameter estimates; Abbreviations: Standard error (SE); Relative Risk (RR); lower boundary of 95% confidence interval (LCL); upper boundary of 95% confidence interval (UCL); Global negative binomial regression (GNBR); Akaike's information criterion (AIC).

**Table S5.** Parameter estimates and the Relative Risk of the COVID-19 incidence associated with health and SES determinants by three time periods corresponding with the early, middle and late phases

|                                 | Early phase |                    |         | Middle phase |                    |         | Late phase |                    |         |
|---------------------------------|-------------|--------------------|---------|--------------|--------------------|---------|------------|--------------------|---------|
|                                 | Estimate    | RR (LCL - UCL)     | P-value | Estimate     | RR (LCL - UCL)     | P-value | Estimate   | RR (LCL - UCL)     | P-value |
| Healthcare access               | -0.14       | 0.87 (0.82 - 0.93) | <.0001  | -0.13        | 0.88 (0.84 - 0.93) | <.0001  | -0.09      | 0.92 (0.87 - 0.96) | 0.001   |
| Health behaviour                | 0.04        | 1.04 (1.00 - 1.08) | 0.028   | 0.03         | 1.03 (1.00 - 1.06) | 0.080   | 0.05       | 1.05 (1.02 - 1.08) | 0.001   |
| Crowding                        | 0.22        | 1.25 (0.99 - 1.57) | 0.058   | -0.05        | 0.96 (0.83 - 1.10) | 0.512   | -0.23      | 0.79 (0.70 - 0.89) | 0.000   |
| Area morbidity                  | 0.05        | 1.05 (1.03 - 1.06) | <.0001  | 0.04         | 1.04 (1.02 - 1.06) | <.0001  | 0.003      | 1.00 (0.99 - 1.02) | 0.729   |
| Education                       | -0.11       | 0.90 (0.83 - 0.97) | 0.005   | -0.08        | 0.92 (0.88 - 0.97) | 0.003   | -0.03      | 0.97 (0.93 - 1.02) | 0.223   |
| Difficulty to social distancing | 0.07        | 1.07 (1.01 - 1.14) | 0.021   | 0.06         | 1.06 (1.02 - 1.11) | 0.006   | 0.005      | 1.00 (0.96 - 1.05) | 0.843   |
| Population mobility             | -0.38       | 0.69 (0.57 - 0.82) | <.0001  | -0.02        | 0.98 (0.84 - 1.14) | 0.791   | 0.14       | 1.15 (0.99 - 1.33) | 0.061   |

Early phase: January 20 to March 20, 2020; Middle phase: March 21 to April 15, 2020; Late phase: April 16 to July 1, 2020. Abbreviations: Relative Risk (RR); lower boundary of 95% confidence interval (LCL); upper boundary of 95% confidence interval (UCL).

**Table S6.** Matrix table of Pearson's correlation coefficients (r)

|                                 | Healthcare access | Health behaviour | Crowding | Area morbidity | Education | Difficulty to social distancing | Population mobility |
|---------------------------------|-------------------|------------------|----------|----------------|-----------|---------------------------------|---------------------|
| Healthcare access               | 1                 |                  |          |                |           |                                 |                     |
| Health behaviour                | 0.547             | 1                |          |                |           |                                 |                     |
| Crowding                        | 0.568             | 0.124            | 1        |                |           |                                 |                     |
| Area morbidity                  | 0.604             | 0.534            | 0.415    | 1              |           |                                 |                     |
| Education                       | 0.127             | 0.390            | -0.080   | 0.510          | 1         |                                 |                     |
| Difficulty to social distancing | -0.032            | 0.370            | -0.047   | 0.311          | 0.315     | 1                               |                     |
| Population mobility             | -0.096            | 0.086            | -0.019   | 0.018          | 0.163     | 0.129                           | 1                   |
